# Supplementary material for: Risk associated with central catheters for malignant tumor patients: a systematic review and meta-analysis
Source: PubMed Central journal article supplement (PMC5844754; doi:10.18632/oncotarget.24212), 2018-01-12
Supplement: oncotarget-09-12376-s001.pdf [file oncotarget-09-12376-s001.pdf]

## **Risk associated with central catheters for malignant tumor patients: a systematic review and meta-analysis**

### **SUPPLEMENTARY MATERIALS**

**Supplementary Table 1: PRISMA of the manuscript.** See Supplementary Table 1

**Supplementary Table 2: The searching history of pubmed.** See Supplementary Table 2

**Supplementary Table 3: Characteristics of included studies.** See Supplementary Table 3
